# Supplementary material
Source: MDPI journal article supplement (https://www.mdpi.com/2673-4591/37/1/22)
Supplement: s1 [file s1 › engproc-2512829-supplementary.pdf]

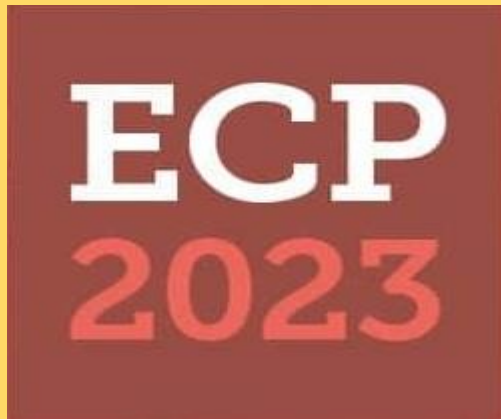

ECP 2023: The 2nd International  
Electronic Conference on Processes:  
Process Engineering—Current State  
and Future Trends

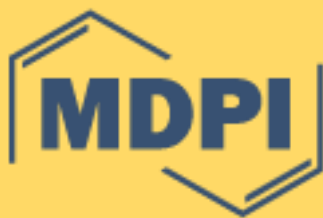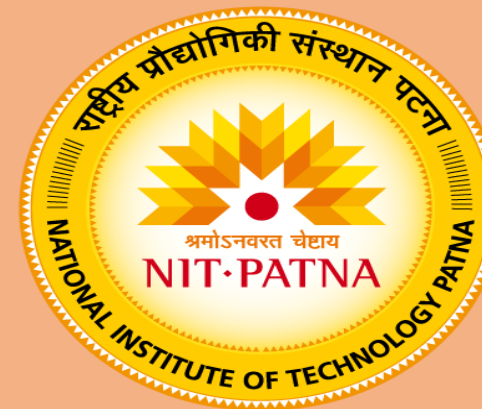

**The Potential of Algae Biofuel as  
a Renewable and Sustainable  
Bioresource**

**Id-** [sciforum-070863](#)

**Presented by: Krishna Neeti  
(Research Scholar)**

- ❑ Recent years have witnessed global energy consumption steadily increase as a result of rapid urbanization and industrial development
- ❑ Conventional fossil fuels such as oil, coal, and natural gas still represent the primary energy supply. Renewable and sustainable sources such as wind, solar, tidal hydropower and biomass must be applied to meet the increasing energy demands
- ❑ Algae species boast over 30000 varieties that reproduce rapidly making them one of the most diverse groups among plants
- ❑ Microalgae are capable of rapidly growing through photosynthesis, carbon dioxide, and nutrients and also producing significant oil production that can be extracted by disrupting their cell structure and producing biofuels (Biodiesel, Bioethanol, Biohydrogen, Bio-oil and Biohydrogen)
- ❑ With various conversion processes such as Transesterification Fermentation Pyrolysis, and Anaerobic Digestion, algal feedstock could easily be transformed into algae-based biofuels
- ❑ The algae can withstand almost all environments and temperatures, including extreme cold and scorching heat
- ❑ They can eliminate CO<sub>2</sub> from industrial chimney gases by bio-fixation, and after oil extraction, produce electricity or heat energy, as well as biofertilizer, animal feed, healthcare products, and food products

# Overview of Algae

- ☐ A wide variety of algae exist in different sizes and forms, including single-celled microalgae and the largest multicellular seaweeds
- ☐ Algae produce organic compounds through photosynthesis
- ☐ Algae are highly efficient biofuel sources due to their ability to convert solar energy directly into biomass

# Classification of algae

Algae can be classified according to various characteristics such as size, cell type, habitat, energy source, pigment color, and motion. Classification of algae is illustrated in Figure 1

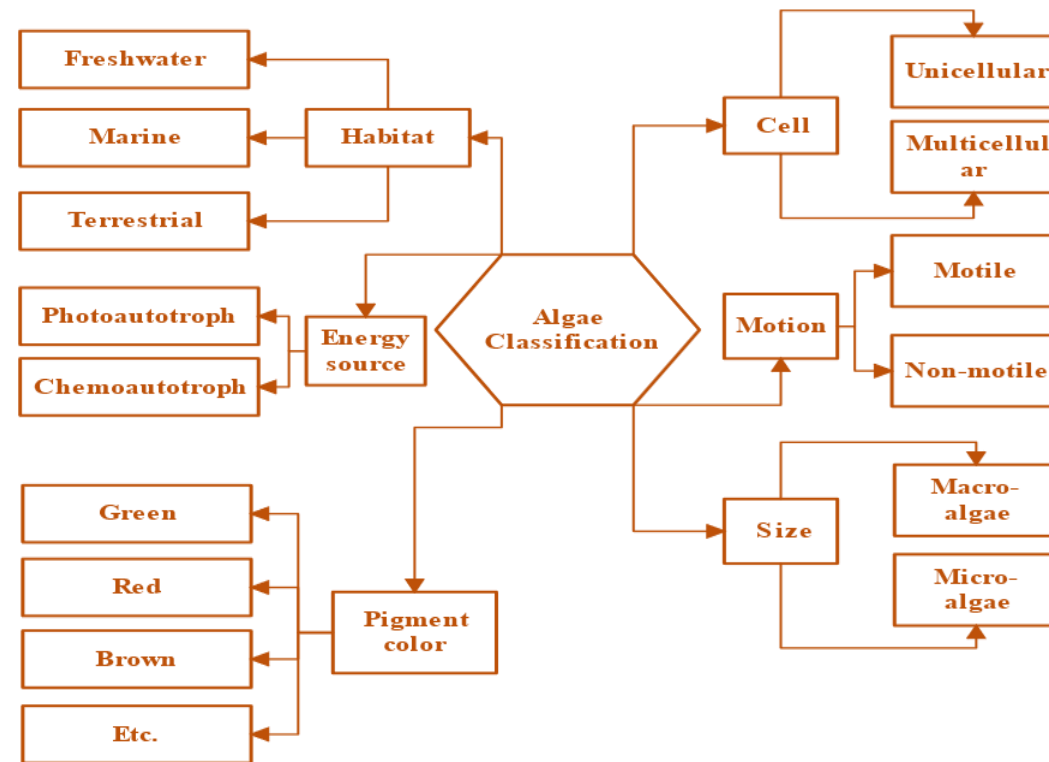

Figure S1 Classification of algae

- ❑Sustainably developing algae means using this natural resource in a way that minimizes greenhouse gas emissions while decreasing our dependence on non-renewable resources
- ❑Furthermore, sustainable development means minimizing negative environmental impacts while optimizing economic and social benefits. Table 1 details these applications and benefits of algae in sustainable development in various fields

**Table S1** Algae's contributions to sustainable development in a variety of contexts

| Areas                     | Application          | Benefits                                                                                                                                                                    |
|---------------------------|----------------------|-----------------------------------------------------------------------------------------------------------------------------------------------------------------------------|
| Energy Production         | Power generation     | <ul style="list-style-type: none"><li>- Algae-powered microbial fuel cells produce electricity</li><li>- Algae biogas used to generate electricity</li></ul>                |
| Environmental Remediation | Carbon sequestration | <ul style="list-style-type: none"><li>- Algae improve water quality, ecological health, and biodiversity</li><li>- Algae are used as carbon reservoirs by stores.</li></ul> |
| Food and Agriculture      | Nutrient Supplement  | <ul style="list-style-type: none"><li>- Nutritional vitamins, minerals, and omega-3 fatty acids are found in algae</li></ul>                                                |
| Sustainable Materials     | Bioplastics          | <ul style="list-style-type: none"><li>- Algae-based bioplastic</li><li>- Algae-based polymers help reduce plastic use and waste</li></ul>                                   |
| Waste Management          | Wastewater treatment | <ul style="list-style-type: none"><li>- algae extract nutrients and toxins from wastewater</li></ul>                                                                        |

# Types of Algae Biofuels

- ❑ Different biomass from different sources like forests, farms, and aquatic environments has been considered feedstock for the production of various biofuels such as biodiesel, bioethanol, biogas, bio-oil, and biohydrogen
- ❑ Algae are an economical and eco-friendly choice when it comes to producing biodiesel; numerous techniques exist that transform it into algae-based fuels. Table 2 details their production process

**Table S2** Production process of algae biofuel

| Types of algae biofuels | Production process  |
|-------------------------|---------------------|
| Biodiesel               | Transesterification |
| Bioethanol              | Fermentation        |
| Biohydrogen             | Fermentation        |
| Bio-oil                 | Pyrolysis           |
| Biogas                  | Anaerobic digestion |

❑ Algae biofuel offers several advantages over traditional fossil fuels and other biofuels. Table 3 lists these advantages of algae biofuel, with descriptions

**Table S3** Advantages of Algae Biofuels

| Advantage                            | Description                                                                                                                                                                   |
|--------------------------------------|-------------------------------------------------------------------------------------------------------------------------------------------------------------------------------|
| Carbon neutral                       | Conversely, algae absorb CO <sub>2</sub> during growth which balances out any CO <sub>2</sub> released during combustion.                                                     |
| High productivity                    | Algae is an attractive biofuel crop due to its fast growth rate and high biomass output per unit area.                                                                        |
| No competition with food crops       | Algae are not a competition to food crops.                                                                                                                                    |
| Potential for sustainable production | Algae can be grown safely and sustainably within an enclosed system (photobioreactor), eliminating contamination risk while simultaneously supporting sustainable production. |
| Versatility                          | Algae can produce biodiesel, bioethanol, biohydrogen, and bio-oil as by-products from its fermentation. Biogas production also depends on algae for power.                    |
| Waste reduction                      | Algae can be grown using wastewater or carbon dioxide emissions from industrial processes, reducing pollution and waste while decreasing pollution levels.                    |

# Indian Scenario of Algal Biofuel

- ❑ India currently ranks fifth globally, using 4.1% of global energy production. By 2025, however, it is expected to surpass both China and the US to become the third-biggest energy user worldwide
- ❑ India boasts the world's highest urban electrification rate (93.1%), as well as the world's largest rural population rural electrification schemes, are implemented at various times across rural regions; however, due to limited electricity generating capacity in India, it makes these plans hard to implement
- ❑ India has shown increasing interest in algae production for various purposes and is taking steps to advance it through research, development, and commercialization. Table 4 depicts India's recent progress and program related to algal biofuel

**Table S4** The Indian scenario of algal biofuel in recent years

| Year | Research/ Program                                                                                                                                                                                                                                                     |
|------|-----------------------------------------------------------------------------------------------------------------------------------------------------------------------------------------------------------------------------------------------------------------------|
| 2010 | The Department of Biotechnology (DBT) initiated its "National Program on Microalgal Technologies" to advance the development and utilization of microalgae in India.                                                                                                  |
| 2012 | The Indian government announced plans to produce biofuel from algae, to produce 20,000 tons of algal biofuel per year by 2017.                                                                                                                                        |
| 2013 | The Indian Institute of Technology Madras IITM established a pilot-scale facility for cultivating microalgae for biofuel production.                                                                                                                                  |
| 2016 | The Department of Biotechnology (DBT) established the University of Madras' "Centre of Excellence for Algae Research", to further promote algae research and technology development.                                                                                  |
| 2017 | The Council of Scientific and Industrial Research CSIR launches a project to develop cost-effective technology for producing biofuel from algae.                                                                                                                      |
| 2020 | The DBT and International Energy Agency's (IEA) "Bioenergy Task 39" recently issued a joint report on India's potential algal biofuel market, calling for further research and development to overcome technical and economic obstacles to algal biofuel development. |

- ❑ Algae biofuels have long been seen as a potential replacement for traditional fossil fuels in our energy needs, producing biofuels from algal biomass with several advantages over first and second-generation feedstocks
- ❑ Unfortunately, algae biofuel production remains underdeveloped on a large scale; therefore, revisits will need to take place to address any technology-related issues. Table 5 offers details of all of these issues with algae biofuel production

**Table S5** Algae Biofuel Challenges

| Challenges            | Description                                                                                                                                           |
|-----------------------|-------------------------------------------------------------------------------------------------------------------------------------------------------|
| Contamination         | Growing algae can be challenging in terms of avoiding contamination.                                                                                  |
| High production cost  | Algal biofuels have become more expensive to produce in comparison with fossil fuels.                                                                 |
| Land use              | Massive cultivation of algae would require considerable space, which may conflict with other activities like farming or protecting wildlife habitats. |
| Scalability           | One of the greatest challenges associated with algae farming is scaling.                                                                              |
| Temperature and light | Air, water, and light conditions may alter algae growth and yield due to changes in environmental conditions.                                         |
| Water quality         | Maintaining water quality in an industrial-scale algae farm poses a significant technological challenge.                                              |

- ❑ Microalgae have one of the fastest growth rates among photosynthetic organisms and can be grown on non-arable soil using wastewater as their nutrient source, offering exciting prospects for biofuel production from them
- ❑ Algae-based fuels are considered one of the most cost-effective, renewable, sustainable, renewable, environmentally friendly solutions to climate change and food security; potentially meeting long-term global fuel demands by meeting energy demand from microalgae cultivation approaches as well as efficient low-cost harvesting methodologies
- ❑ Nevertheless, more research needs to take place if microalgae will produce biofuel production from them than currently possible due to cultivation approaches as well as the lack of effective low-cost harvesting mechanisms from this organism

1. Ahmad, T.; Zhang, D. A Critical Review of Comparative Global Historical Energy Consumption and Future Demand: The Story Told so Far. *Energy Reports* 2020, 6, 1973–1991, doi:10.1016/J.EGYR.2020.07.020.
2. Megia, P.J.; Vizcaino, A.J.; Calles, J.A.; Carrero, A. Hydrogen Production Technologies: From Fossil Fuels toward Renewable Sources. A Mini Review. *Energy and Fuels* 2021, 35, 16403–16415, doi:10.1021/ACS.ENERGYFUELS.1C02501/ASSET/IMAGES/LARGE/EF1C02501\_0004.JPEG.
3. Yang, Y.; Du, L.; Hosokawa, M.; Miyashita, K. Total Lipids Content, Lipid Class and Fatty Acid Composition of Ten Species of Microalgae. *J. Oleo Sci.* 2020, 69, 1181–1189, doi:10.5650/JOS.ESS20140.
4. Laurens, L.M.L.; Chen-Glasser, M.; McMillan, J.D. A Perspective on Renewable Bioenergy from Photosynthetic Algae as Feedstock for Biofuels and Bioproducts. *Algal Res.* 2017, 24, 261–264, doi:10.1016/J.ALGAL.2017.04.002.
5. Aro, E.M. From First Generation Biofuels to Advanced Solar Biofuels. *Ambio* 2016, 45, 24–31, doi:10.1007/S13280-015-0730-0/FIGURES/1.
6. Barta, D.G.; Coman, V.; Vodnar, D.C. Microalgae as Sources of Omega-3 Polyunsaturated Fatty Acids: Biotechnological Aspects. *Algal Res.* 2021, 58, 102410, doi:10.1016/J.ALGAL.2021.102410.
7. García-Márquez, J.; Rico, R.M.; Sánchez-Saavedra, M. del P.; Gómez-Pinchetti, J.L.; Acién, F.G.; Figueroa, F.L.; Alarcón, F.J.; Morínigo, M.Á.; Abdala-Díaz, R.T. A Short Pulse of Dietary Algae Boosts Immune Response and Modulates Fatty Acid Composition in Juvenile *Oreochromis niloticus*. *Aquac. Res.* 2020, 51, 4397–4409, doi:10.1111/ARE.14781.
8. Kumar, M.; Dutta, S.; You, S.; Luo, G.; Zhang, S.; Show, P.L.; Sawarkar, A.D.; Singh, L.; Tsang, D.C.W. A Critical Review on Biochar for Enhancing Biogas Production from Anaerobic Digestion of Food Waste and Sludge. *J. Clean. Prod.* 2021, 305, 127143, doi:10.1016/J.JCLEPRO.2021.127143.
9. Khandelwal, A.; Vijay, A.; Dixit, A.; Chhabra, M. Microbial Fuel Cell Powered by Lipid Extracted Algae: A Promising System for Algal Lipids and Power Generation. *Bioresour. Technol.* 2018, 247, 520–527, doi:10.1016/J.BIORTECH.2017.09.119.
10. Siddiki, S.Y.A.; Mofijur, M.; Kumar, P.S.; Ahmed, S.F.; Inayat, A.; Kusumo, F.; Badruddin, I.A.; Khan, T.M.Y.; Nghiem, L.D.; Ong, H.C.; et al. Microalgae Biomass as a Sustainable Source for Biofuel, Biochemical and Biobased Value-Added Products: An Integrated Biorefinery Concept. *Fuel* 2022, 307, 121782, doi:10.1016/J.FUEL.2021.121782.

**THANK YOU**
